# Supplementary material for: Identification of Neuroendocrine Stress Response-Related Circulating MicroRNAs as Biomarkers for Type 2 Diabetes Mellitus and Insulin Resistance
Source: Front Endocrinol (Lausanne). 2018 Mar 28;9:132. doi: 10.3389/fendo.2018.00132 (PMC5882838; doi:10.3389/fendo.2018.00132)
Supplement: Table S1 — Data of differentially expressed plasma microRNAs (miRNAs) between type 2 diabetes mellitus (T2DM) patients and healthy controls in microarray. [file data_sheet_1.xlsx]

## Sheet: diff
Name	case1	case2	case3	case4	case5	case6	case7	case8	case9	case10	control1	control2	control3	control4	control5	control6	control7	control8	control9	control10
hsa-miR-363-5p	184	83	134	104	195	97	116	99	110	86	398	183	440.72	432	270	168	259	180	261.13	188
hsa-miR-155-5p	197	226	233	261	184	183	164	220	174	194	104	91	98	109	86.25	101	101	97	114	95
hsa-let-7i-5p	474	471.92	450.42	364	496	389	421	487	546	507	172	101	114	205	267	117	238	130	134.47	250
hsa-let-7b-5p	969	1404.05	1595.77	1436.83	1229	1294.97	1394.68	943	897.47	1889.24	434.38	104	265.67	336.83	429	494.97	794.68	241.71	435	436
hsa-let-7c	1120.85	1416.03	1272	1669.76	1337	1322	1353.42	973	981	2161	413.33	197	195.2	469.76	337	372	553.42	227	344	665
hsa-let-7a-5p	1336	1497.67	1706.79	2338.03	1538.57	1634.75	2144.69	1227	1006	4232.37	441.62	625	226.8	538.03	638.57	334.75	744.69	237.94	599	643
hsa-let-7e-5p	259	257	263	312	249	294	231	337	205	251.71	117	96	102	183.43	182	176	101	90	149	123
hsa-let-7f-5p	998	1017	928.49	595.67	717.19	1245	1017.67	748	698	1459	286	334	160	220.79	467.7	345	317.67	167	445.11	500
hsa-let-7d-5p	583	796.1	873	810.75	359.5	773.75	737	622	593	1293	251	175	149	342	459.81	344.5	347.13	166	200.36	386
hsa-let-7g-5p	445	675	640	793	547	640	601	388	501	812.88	198	287	134	401	323.44	177	387.73	144	301	358
hsa-miR-24-3p	5774.63	5405.8	5155.66	6000	6215	4746.06	6649	6508.83	5759.07	4364.62	3280.31	1562	1121.54	3046.54	3776.76	2254.72	2561.06	1346.79	1854.77	2728
hsa-miR-320c	355	403	466	609	442.8	548	398	434	401	395	218	175	187.42	209	238	198	310	216.1	146.2	235
hsa-miR-143-3p	244.33	451	233.56	289	556	326	263	369	205	229	137	112	135	108	171	104	209.5	122	117	174
hsa-miR-92b-3p	3502.5	4182	2920.9	3372	3779	3989.08	2905	3068	5307	3320	921.59	1027	597.85	834.65	1471	969.74	1920	573.31	1168.8	1222
hsa-miR-144-3p	288.43	350	330	453	457	477	377	338	394	345	144.9	176	116	161.86	223	163	210.33	134	201.11	219
hsa-miR-16-5p	746	1107.4	711.59	846.45	573.02	588.5	773	828	797	698	449	122	425.28	443	419.16	403	382	292	405.09	376
hsa-miR-146a	114.25	81	109	94	154	98	151	94	92	82	277	159	247	166	183	198	275	206	207	231
hsa-miR-106b-5p	294	282	250	403	380	337	281	367	352	255	164	109	114	152	185	117	233	130	149.33	200
hsa-miR-15a-5p	343	390	397.78	462	378	379	372	368	337.73	333	164	175	113	262	208	179	212	128	208	182
hsa-miR-29a-5p	186	166	245	224	199	196	203	280	198	178	101	93	95	90	101	102	99	103	106	90
hsa-miR-93-5p	514.11	673	668	837	954	618.67	664	622	633	540	294.87	109	187	310	275.23	216	343	180	239	349
hsa-miR-21-5p	286	451	439.55	648.91	339	519	438	324	391	376	213.63	103	134	248.91	139	219	238	166	243	176
hsa-miR-20b-5p	279	263	344	401	284.8	326	450	242	217.67	265	157	137	112	172	196	157	133	125	151	105
hsa-miR-7-5p	533.91	673	606	831	485.84	899	561	484	574	617	295.36	372	163.11	334.29	351.9	274.38	367	193	304.6	311
hsa-miR-106a-5p	344	471	569	695	369.25	675	457	395	433	507	243	287	149.5	236	242.56	223.3	258	171.83	240	310
hsa-miR-18a-5p	140	138	227	230	232	228	162	145	254	206	102	97	98	100	102	98	92	95	85	94
hsa-miR-1236-3p	106	101	101	90	104	102	103	112	104	98	327	193	159.23	155	143	161	235	372	244	198
hsa-miR-144-5p	227	232	226	186	192	225	257	245	192	209	109	103	100	107	114.67	126	115	94	112	90
hsa-miR-1275	479.86	387	610	337	528.8	608.7	744	631	295	298	760.63	905	1053.5	980	1049.13	986	1200.6	960.42	1033	1335
hsa-miR-195-5p	697.47	292.25	792	451.22	863.24	807.64	1023	595	557.28	95	1278	1037	2232.9	921.57	1173	930	1276	1253	933	1317
hsa-miR-320a	507.67	673	518	654.2	681	750.92	673	534	880	556	318.89	293	281.09	330	364.55	380.75	429	268	229.2	158
hsa-miR-103a-3p	284	381	246	360	296	402	340	231	280	317	197	93	150	195	164.8	108	185	143	142	107
hsa-miR-221-3p	316.11	255	347	433	560	337	283	296	318	199	145	101	123	138	150	185	173	136	120	106
hsa-miR-375-5p	279	243	268	393	206	189	276	185.78	198	176	150.75	93	150	103	134	111.5	151	97	95	93
hsa-miR-34c-3p	157	175	143	158	134	127.33	131	129	124	109	237	237	219	241	232	293	205	416	378	579
hsa-miR-324-3p	299	359	440	395	343	376	618	648	349	669	242	137	184	188	235	186	285.38	224.38	137	229
hsa-miR-675-3p	95	87	93	108	93	94	91	104	74	93	205	233	189	226	148	138	165	219	224	231
hsa-miR-486-5p	282	256	263	314	409	280	337	259	326	396.5	212	96	114	133	139	123	175	151	110	191
hsa-miR-1973	219	112	312.11	170.71	310	288	367	279	191	104	584.75	481	568.19	285	367	428	460	450.75	699	522
hsa-miR-3620-3p	133.5	88	219	170.81	102	242	196	221.44	212.86	93	294.16	124	449	303	435.13	297	304	508.88	641.11	222
hsa-miR-4507	544	229	526	314.94	508	339	609	424	629	506	1025	1375	1111	1131	737	810.45	983	896	907.5	899
hsa-miR-142-3p	533.73	477.15	557	568	609	332	553	414	430	553	808.29	787	979	831	1256.16	864	1133	1502	902	1346
hsa-miR-4429	240	304	233	275.5	408	252	273	538	675	398	198	104	159.34	129	174	178	133	168	158	150
hsa-miR-4484	166	143	223	184	205	152	196	107	105	98	284	296	449	202	473.15	235	576	301.79	529	273
hsa-miR-4497	872	378.25	1011	573.58	821	982	803	726.5	716	507	1654	861	2660	1776	1482.61	1843.27	1628.79	2577.05	1017	857
hsa-miR-2392	236	157	233.11	214	212	247	268	199	167	189	296	622	294	576	253.88	520	628	481	256.83	581
hsa-miR-4667-5p	242	154	252.67	176	221	251	229	157	110	215	453	493	629	497	286.69	299	573	629	343	391
hsa-miR-4667-3p	104	89	108	140	92	99	97	99	110	83	180	183	160	206	271	213	200	315	249	253
hsa-miR-3620-5p	569	655	542	404	601.05	518	403	534	432	443	1403	1051	958.55	1348	965	1288.09	665.37	1119	961.95	1143
hsa-miR-1273g-3p	284	103	207	170.33	205.95	241	270	238	159	157	541	299	611.13	330	423.5	451.5	410.55	461	327	259
hsa-miR-98-3p	244	271	313	305	234	196	241	191	199	209	107	109	105	99	107	106	114	105	112	140
